# Supplementary material
Source: ML conference proceedings conference paper supplement (https://openaccess.thecvf.com/content/WACV2022/html/Lee_Enhanced_Correlation_Matching_WACV_2022_paper.html)
Supplement: Supplementary file 2 [file Lee_Enhanced_Correlation_Matching_WACV_2022_supplemental.zip]

Archive with 2 entries (2 files):
- 0968-supp.pdf
- 0968-supp.mp4
